# Supplementary material
Source: publisher site journal article supplement (http://www.kjim.org/upload/media/kjim-2017-180-suppl.pdf)
Supplement: Supplementary file 1 [file kjim-2017-180-suppl.pdf]

**Supplementary Table 1. Recurrence of vasovagal syncope between negative and positive HUT**

| Variable                | Total (n = 143) | HUT (-) (n = 92) | HUT (+) (n = 51) | p value |
|-------------------------|-----------------|------------------|------------------|---------|
| Recurrent syncope       | 11 (7.6)        | 8 (8.6)          | 3 (5.8)          | 0.546   |
| Follow-up duration, mon | 8.6 ± 8.0       | 8.8 ± 7.8        | 8.4 ± 8.5        | 0.789   |

Values are presented as number (%) or mean ± SD.

HUT, Head-Up table-tilt Test.
